# Supplementary material for: Fabrication of a Ti3C2Tx modified glassy carbon electrode for the sensitive electrochemical detection of quercetin
Source: Royal Society of Chemistry journal article supplement (doi:10.1039/d1nj04046d), 2021-01-01
Supplement: d1nj04046d1.pdf [file d1nj04046d1.pdf]

*New Journal of Chemistry*

## **Electronic Supplementary Material**

**Fabrication of  $Ti_3C_2T_x$  modified glassy carbon electrode for sensitive electrochemical detection of quercetin**

Yunxiu Sun,<sup>a</sup> Baoli Wang,<sup>b</sup> Xiaoli He,<sup>b</sup> Yitong Wang,<sup>b</sup> Lin Chen,<sup>b</sup> Yuxin Zhu,<sup>b</sup> Guangjiu Li\*<sup>a</sup> and Wei Sun\*<sup>b</sup>

<sup>a</sup> Key Laboratory of Optic-electric Sensing and Analytical Chemistry for Life Science of Ministry of Education, Shandong Key Laboratory of Biochemical Analysis, College of Chemistry and Molecular Engineering, Qingdao University of Science and Technology, Qingdao 266042, P. R. China.

<sup>b</sup> Key Laboratory of Water Pollution Treatment and Resource Reuse of Hainan Province, Key Laboratory of Functional Materials and Photoelectrochemistry of Haikou, College of Chemistry and Chemical Engineering, Hainan Normal University, Haikou 571158, China.

\*Corresponding authors' emails:

lgjqust@126.com

sunwei@hainnu.edu.cn

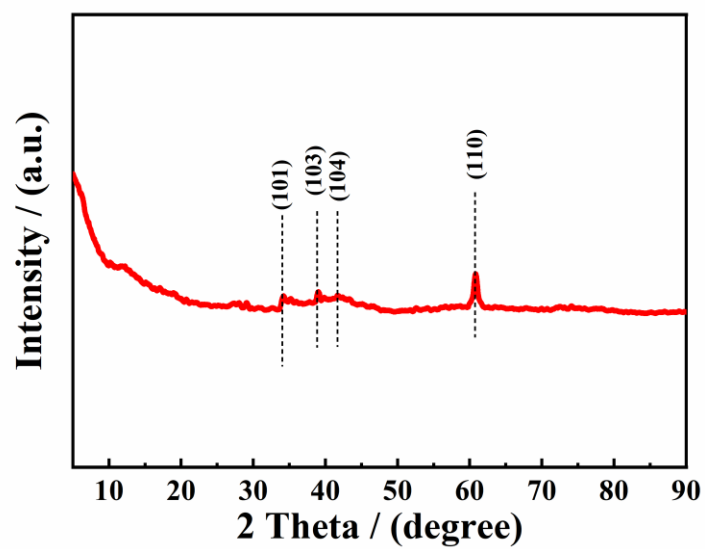

**Fig. S1.** XRD pattern of  $\text{Ti}_3\text{C}_2\text{T}_x$ .

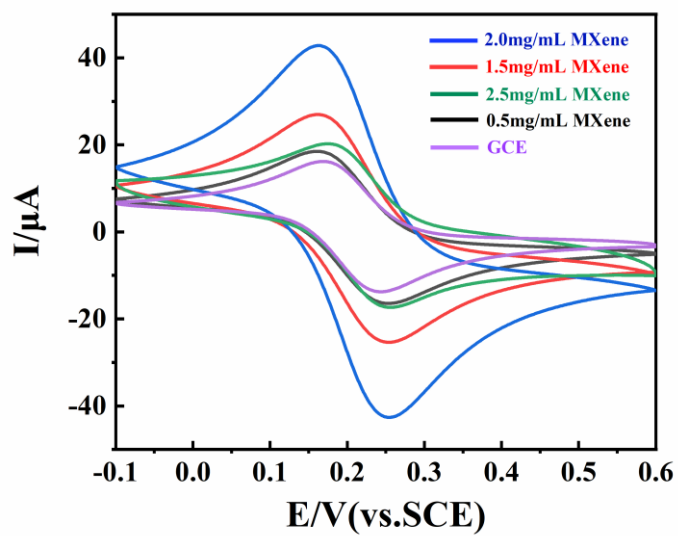

**Fig. S2.** Cyclic voltammograms of different concentration MXene modified GCE in a 0.1 M  $[\text{Fe}(\text{CN})_6]^{3-/4-}$  and 1.0 M KCl mixture with scan rate of 0.1 V/s. The MXene concentrations from inside to outside were 0 mg/mL, 0.5 mg/mL, 2.5 mg/mL, 1.5 mg/mL, 2.0 mg/mL .

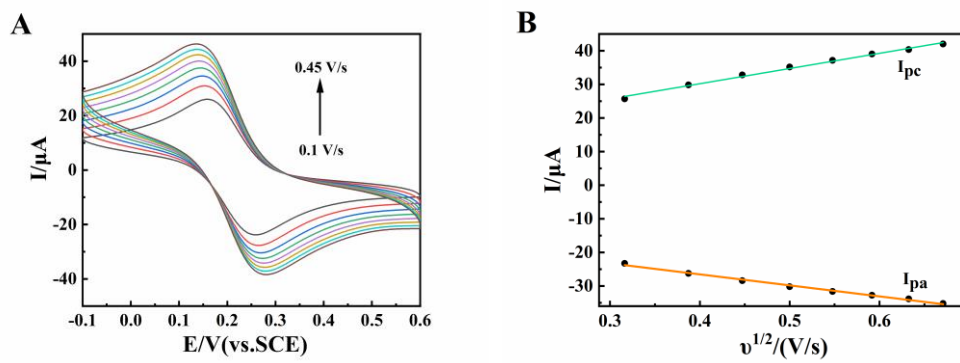

**Fig. S3.** (A) Cyclic voltammetric curves of MXene/GCE at different scan rates in a 0.1 M  $[\text{Fe}(\text{CN})_6]^{3-/4-}$  and 1.0 M KCl mixture ( a $\rightarrow$ n: 0.1, 0.15, 0.2, 0.25, 0.3, 0.35, 0.4, 0.45 V/s); (B) Linear relationship between redox peak current and  $v^{1/2}$ .

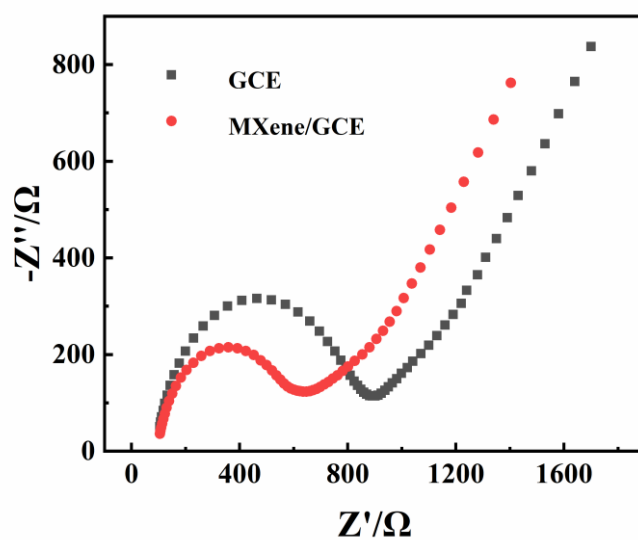

**Fig. S4.** EIS of GCE and MXene/GCE with amplitude of 5 mV and scanning frequency from 100 kHz to 0.1 Hz.

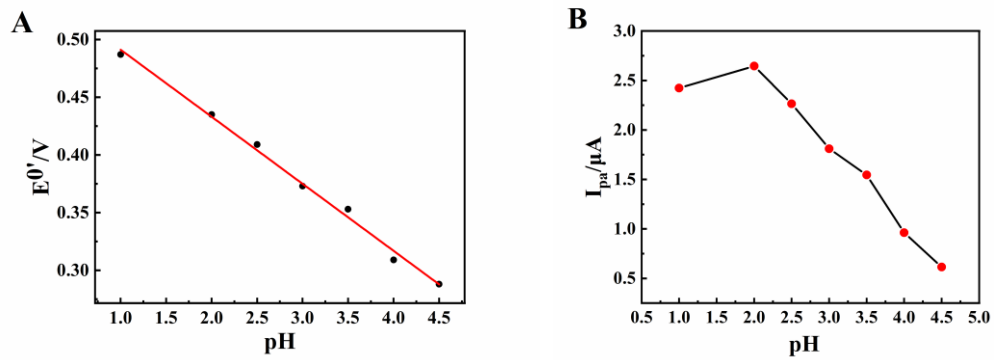

**Fig. S5.** (A) Linear relationship of  $E^{0'}$  and pH in different pH PBS and (B) The relationship curve between  $I_{pa}$  and pH for 100  $\mu M$  quercetin.

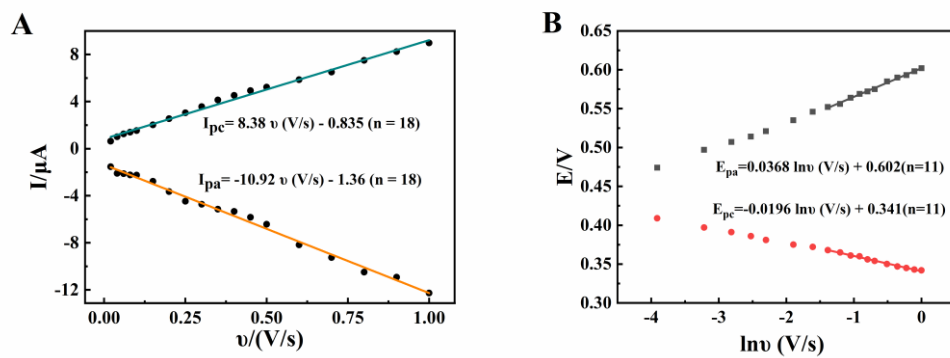

**Fig. S6.** Linear relationship between (A) the redox peak currents versus scan rates ( $v$ ) and (B) the redox peak potentials versus  $\ln v$  of MXene/GCE in 100  $\mu\text{M}$  quercetin solution.

**Table S1.** Electrochemical parameters of 100  $\mu\text{M}$  quercetin on different modified

electrodes at pH 2.0 PBS

| Electrode | $I_{pa}/\mu\text{A}$ | $I_{pc}/\mu\text{A}$ | $E_{pa}/\text{V}$ | $E_{pc}/\text{V}$ | $\Delta E/\text{mV}$ | $E^{0'}/\text{V}$ |
|-----------|----------------------|----------------------|-------------------|-------------------|----------------------|-------------------|
| GCE       | 1.651                | 1.224                | 0.512             | 0.364             | 148                  | 0.438             |
| MXene/GCE | 2.732                | 1.566                | 0.476             | 0.409             | 67                   | 0.443             |

\*  $I_{pa}$  represents the oxidation peak current,  $I_{pc}$  represents the reduction peak current,  $E_{pa}$  represents the oxidation peak potential,  $E_{pc}$  represents the reduction peak potential,  $\Delta E$  represents peak-to-peak separation,  $E^{0'}$  represents the formal potential.
